# Supplementary material
Source: PubMed Central journal article supplement (PMC5756491)

Enrolled subjects  
(n=42)

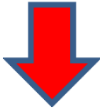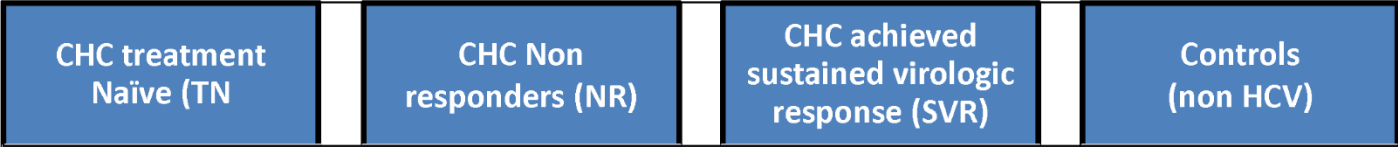

• N=12

• N=10

• N=10

• N=10

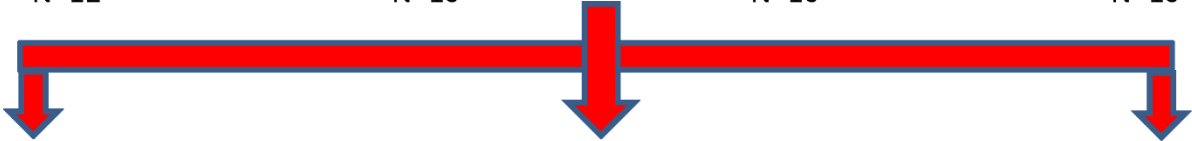

Colon biopsy

Liver Biopsy

Blood

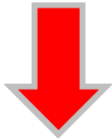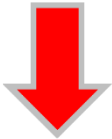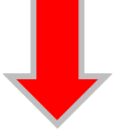

Immunohistochemistry and confocal imaging

METAVIR scoring system

Real Time RT-PCR

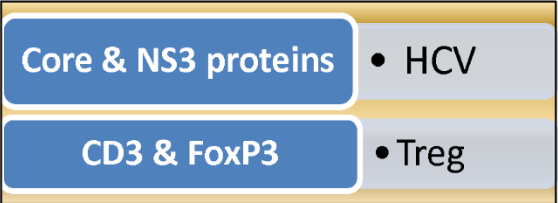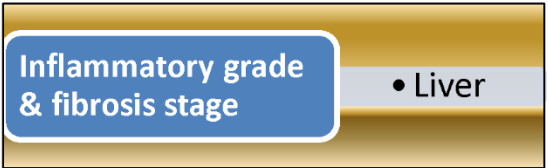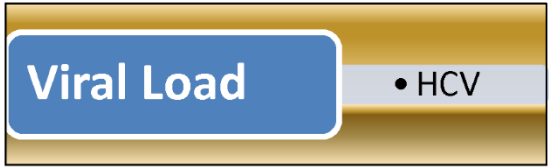

Supplement: jmm-65-703-s001.pdf [file jmm-65-703-s001.pdf]
